# Supplementary material
Source: PubMed Central journal article supplement (PMC3501076)
Supplement: supp_M112.393538_jbc.M112.393538-1.pdf [file supp_M112.393538_jbc.M112.393538-1.pdf]

## Supplemental Figure

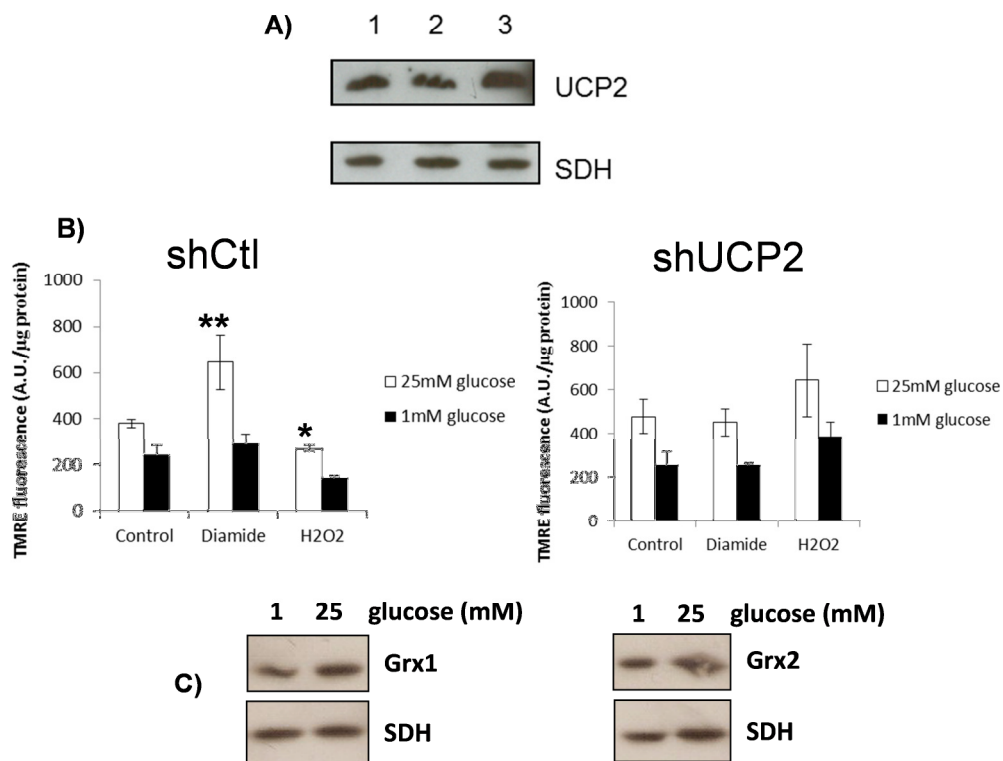

**Supplemental Figure:** **A)** Immunoblot detection of UCP2 in Min6 cells isolated from 3 separate cultures. **B)** UCP2 knockdown abolishes the diamide-mediated increase in TMRE fluorescence. Min6 cells transduced with either short hairpin control (shCtl) or UCP2 (shUCP2) lentiviral particles were starved and then incubated for 1h in KRB containing 25mM or 1mM dextrose with either diamide (100µM) or H<sub>2</sub>O<sub>2</sub> (10µM) and TMRE (10nM). Cells were then measured for TMRE fluorescence. Data were normalized to total cellular protein/well and background fluorescence. n=4, mean±SEM, 1-way ANOVA with Fisher's protected least significant difference post-hoc test. \* and \*\* denote p≤0.05 and 0.01, respectively, when compared to the 25mM glucose control. **C)** Immunoblot detection of Grx1 and Grx2 in Min6 cells treated with 1mM or 25mM glucose.
